# Supplementary material
Source: PubMed Central journal article supplement (PMC4038106)
Supplement: NIHMS579353-supplement-Supplemental_Data.pdf [file NIHMS579353-supplement-Supplemental_Data.pdf]

**Table S1: Isolate descriptions with compiled phenotypic data**

| strain identification | Ribotype | Severe Disease? | <i>tcdA</i> <sup>a</sup> | <i>tcdB</i> | <i>cdtA</i> | <i>cdtB</i> | <i>tcdC</i> <sup>b</sup> | Sporulation <sup>c</sup> | Toxin <sup>d</sup> | CFE <sup>e</sup> | growth rate <sup>f</sup> |
|-----------------------|----------|-----------------|--------------------------|-------------|-------------|-------------|--------------------------|--------------------------|--------------------|------------------|--------------------------|
| Cd040                 | 001      | N               | +                        | +           | -           | -           | sc3                      | 47500                    | 0.079              | 21.95            | 0.1351                   |
| Cd047                 | 001      | N               | +                        | +           | -           | -           | sc3                      | 10150                    | 0.511              | 64.15            | 0.1028                   |
| Cd092                 | 001      | N               | +                        | +           | -           | -           | sc3                      | 693                      | 0.039              | 53.59            | 0.2002                   |
| DA00679               | 001      | N               | +                        | +           | -           | -           | sc3                      | 70                       | 0.442              | 5.30             | 0.1372                   |
| Cd013                 | 013      | N               | +                        | +           | -           | -           | sc9                      | 7550                     | 0.240              | 51.32            | 0.0792                   |
| DA00330               | 017      | N               | +                        | +           | -           | -           | sc7                      | 9633                     | 18.410             | 44.47            | 0.0704                   |
| Cd084                 | 027      | Y               | +                        | +           | +           | +           | sc1                      | 2110                     | 2.989              | 47.49            | 0.2966                   |
| Cd180                 | 027      | Y               | +                        | +           | +           | +           | sc1                      | 7167                     | 1.645              | 69.31            | 0.2158                   |
| DA00353               | 027      | Y               | +                        | +           | +           | +           | ND                       | 41000                    | 15.771             | 79.05            | 0.0666                   |
| DA00356               | 027      | Y               | +                        | +           | +           | +           | ND                       | 43650                    | 16.321             | 35.86            | 0.0787                   |
| DA00394               | 027      | Y               | +                        | +           | +           | +           | ND                       | 53000                    | 3.800              | 36.23            | 0.0703                   |
| DA00395               | 027      | Y               | +                        | +           | +           | +           | ND                       | 16433                    | 2.780              | 42.79            | 0.0645                   |
| DA00431               | 027      | Y               | +                        | +           | +           | +           | ND                       | 64000                    | 3.053              | 39.56            | 0.0637                   |
| DA00458               | 027      | Y               | +                        | +           | +           | +           | ND                       | 27850                    | 2.993              | 55.19            | 0.0777                   |
| DA00643               | 027      | Y               | +                        | +           | +           | +           | ND                       | 3957                     | 2.728              | 51.61            | 0.0734                   |
| DA00684               | 027      | Y               | +                        | +           | +           | +           | ND                       | 25500                    | 1.563              | 42.33            | 0.0345                   |
| Cd093                 | 027      | unknown         | +                        | +           | +           | +           | sc1                      | 5867                     | 1.848              | 57.11            | ND                       |
| Cd016                 | 027      | N               | +                        | +           | +           | +           | sc1                      | 1197                     | 2.525              | 14.21            | 0.3520                   |
| Cd025                 | 027      | N               | +                        | +           | +           | +           | sc1                      | 7600                     | 0.135              | 42.89            | 0.0880                   |
| Cd073                 | 027      | N               | +                        | +           | +           | +           | sc1                      | 6500                     | 4.168              | 55.53            | 0.0772                   |
| Cd089                 | 027      | N               | +                        | +           | +           | +           | sc1                      | 1700                     | 1.030              | 53.75            | 0.0507                   |
| Cd105                 | 027      | N               | +                        | +           | +           | +           | sc1                      | 7600                     | 1.491              | 51.41            | 0.1021                   |
| Cd106                 | 027      | N               | +                        | +           | +           | +           | sc1                      | 10300                    | 2.366              | 34.16            | 0.0519                   |
| Cd108                 | 027      | N               | +                        | +           | +           | +           | sc1                      | 9050                     | 0.219              | 44.92            | 0.0730                   |
| Cd148                 | 027      | N               | +                        | +           | +           | +           | sc1                      | 5300                     | 1.466              | 48.60            | 0.0724                   |
| Cd154                 | 027      | N               | +                        | +           | +           | +           | sc1                      | 10850                    | 1.103              | 67.74            | 0.1430                   |
| Cd199                 | 027      | N               | +                        | +           | +           | +           | sc1                      | 8100                     | 2.277              | 57.65            | 0.1071                   |
| DA00309               | 027      | N               | +                        | +           | +           | +           | sc1                      | 3167                     | 2.602              | 40.98            | 0.0604                   |
| DA00464               | 027      | N               | +                        | +           | +           | +           | sc1                      | 13100                    | 5.675              | 56.89            | 0.0561                   |
| DA00658               | 027      | N               | +                        | +           | +           | +           | sc1                      | 450                      | 2.725              | 11.20            | 0.0628                   |
| FOBT128               | 027      | N               | +                        | +           | +           | +           | sc1                      | 3650                     | 4.864              | 45.84            | 0.0499                   |

|         |         |         |   |   |   |   |        |       |       |       |        |
|---------|---------|---------|---|---|---|---|--------|-------|-------|-------|--------|
| FOBT142 | 027     | N       | + | + | + | + | sc1    | 90333 | 5.737 | 70.69 | 0.0577 |
| FOBT195 | 027     | N       | + | + | + | + | sc1    | 2367  | 0.120 | 78.16 | 0.0640 |
| FOBT468 | 027     | N       | + | + | + | + | sc1    | 6450  | 6.407 | 68.31 | 0.0435 |
| Cd070   | 014-020 | Y       | + | + | - | - | sc9    | 1450  | 0.156 | 19.99 | 0.1594 |
| Cd088   | 014-020 | Y       | + | + | - | - | sc9    | 3633  | 0.895 | 64.77 | 0.3176 |
| DA00062 | 014-020 | Y       | + | + | - | - | sc9    | 5650  | 0.119 | 63.86 | 0.1642 |
| DA00149 | 014-020 | Y       | + | + | - | - | sc9    | 5633  | 0.115 | 26.53 | 0.0667 |
| DA00174 | 014-020 | Y       | + | + | - | - | sc9    | 5450  | 1.965 | 77.37 | 0.1146 |
| DA00245 | 014-020 | Y       | + | + | - | - | sc9    | 8967  | 1.075 | 48.62 | 0.2432 |
| DA00289 | 014-020 | Y       | + | + | - | - | ND     | 28650 | 4.264 | 51.63 | 0.1086 |
| Cd072   | 014-020 | unknown | + | + | - | - | sc9    | 3643  | 0.238 | 53.04 | ND     |
| Cd182   | 014-020 | unknown | + | + | - | - | sc9    | 3673  | 0.463 | 29.04 | ND     |
| Cd038   | 014-020 | N       | + | + | - | - | sc9    | 23900 | 2.722 | 72.60 | 0.1059 |
| Cd039   | 014-020 | N       | + | + | - | - | sc9    | 21300 | 0.028 | 39.54 | 0.1869 |
| Cd071   | 014-020 | N       | + | + | - | - | sc9    | 4663  | 0.213 | 73.49 | 0.1215 |
| Cd109   | 014-020 | N       | + | + | - | - | sc9    | 4567  | 0.050 | 57.86 | 0.2017 |
| Cd111   | 014-020 | N       | + | + | - | - | sc9    | 5650  | 1.412 | 57.09 | 0.1108 |
| Cd112   | 014-020 | N       | + | + | - | - | sc9    | 6950  | 1.722 | 57.09 | 0.1129 |
| Cd124   | 014-020 | N       | + | + | - | - | sc9    | 6600  | 0.060 | 77.30 | 0.1867 |
| Cd125   | 014-020 | N       | + | + | - | - | sc9    | 4600  | 0.119 | 51.01 | 0.1920 |
| Cd127   | 014-020 | N       | + | + | - | - | sc9    | 11950 | 0.051 | 77.76 | 0.2034 |
| Cd144   | 014-020 | N       | + | + | - | - | sc9    | 14533 | 0.104 | 34.70 | 0.1823 |
| Cd202   | 014-020 | N       | + | + | - | - | sc9    | 8350  | 0.959 | 40.59 | 0.1338 |
| Cd204   | 014-020 | N       | + | + | - | - | sc9    | 5950  | 0.098 | 50.88 | 0.1964 |
| Cd208   | 014-020 | N       | + | + | - | - | sc9    | 917   | 0.191 | 39.73 | 0.0783 |
| DA00698 | 014-020 | N       | + | + | - | - | sc9    | 3235  | 2.672 | 44.10 | 0.0902 |
| DA00493 | 053-163 | Y       | + | + | - | - | ND     | 6150  | 2.626 | 31.79 | 0.1356 |
| Cd042   | 053-163 | N       | + | + | - | - | UM-001 | 14200 | 0.176 | 61.45 | 0.1340 |
| Cd205   | 053-163 | N       | + | + | - | - | UM-001 | 140   | 0.799 | 38.00 | 0.0888 |
| DA00603 | 053-163 | N       | + | + | - | - | UM-001 | 10800 | 4.524 | 60.62 | 0.1172 |
| Cd006   | 078-126 | Y       | + | + | + | + | A      | 1190  | 0.049 | 55.21 | 0.1042 |
| Cd054   | 078-126 | unknown | + | + | + | + | A      | 1350  | 0.041 | 58.74 | ND     |
| Cd033   | 078-126 | N       | + | + | + | + | A      | 0     | 0.051 | 2.01  | 0.1191 |
| DA00599 | 078-126 | N       | + | + | + | + | A      | 2065  | 0.329 | 30.15 | 0.1815 |
| DA00244 | UM1     | Y       | + | + | - | - | UM-002 | 5400  | 1.282 | 48.23 | 0.0976 |
| Cd017   | UM1     | N       | + | + | - | - | sc9    | 2280  | 0.066 | 74.94 | 0.1313 |

|         |                     |   |    |    |    |    |        |       |        |       |        |
|---------|---------------------|---|----|----|----|----|--------|-------|--------|-------|--------|
| Cd046   | UM1                 | N | +  | +  | -  | -  | sc9    | 11300 | 0.314  | 60.76 | 0.0754 |
| DA00481 | UM1                 | N | +  | +  | -  | -  | sc9    | 17633 | 5.535  | 50.78 | 0.0773 |
| Cd041   | UM11                | Y | +  | +  | -  | -  | UM-001 | 10567 | 0.223  | 35.28 | 0.1435 |
| DA00152 | UM11                | Y | +  | +  | -  | -  | UM-001 | 5850  | 0.061  | 59.32 | 0.0612 |
| DA00299 | UM11                | Y | +  | +  | -  | -  | ND     | 33900 | 0.173  | 52.98 | 0.1576 |
| Cd104   | UM11                | N | +  | +  | -  | -  | UM-001 | 1250  | 0.058  | 40.80 | 0.1176 |
| DA00677 | UM16                | Y | ND | ND | ND | ND | ND     | 45000 | 3.508  | 56.62 | 0.0632 |
| Cd030   | UM16                | N | +  | +  | -  | -  | UM-001 | 4970  | 0.039  | 54.10 | 0.1384 |
| Cd087   | UM19                | Y | +  | +  | +  | +  | UM-012 | 11500 | 0.089  | 55.40 | 0.1897 |
| Cd194   | UM2                 | Y | +  | +  | -  | -  | B      | 7000  | 1.402  | 69.31 | 0.3339 |
| Cd004   | UM22                | N | +  | +  | +  | +  | UM-012 | 5800  | 0.318  | 16.01 | 0.0886 |
| DA00383 | UM23                | Y | ND | ND | ND | ND | ND     | 33933 | 275.50 | 38.76 | 0.1013 |
| Cd166   | UM3                 | Y | +  | +  | -  | -  | B      | 14867 | 23.025 | 68.43 | 0.1130 |
| Cd009   | UM3                 | N | +  | +  | -  | -  | B      | 9450  | 2.469  | 53.08 | 0.1028 |
| Cd043   | UM3                 | N | +  | +  | -  | -  | B      | 2510  | 0.331  | 89.55 | 0.1180 |
| Cd086   | UM3                 | N | +  | +  | -  | -  | B      | 0     | 0.869  | 50.56 | 0.1205 |
| DA00378 | UM32                | N | ND | ND | ND | ND | UM-001 | 9750  | 0.708  | 17.70 | 0.1416 |
| DA00699 | UM33                | N | ND | ND | ND | ND | sc5    | 8867  | 1.037  | 60.66 | 0.0997 |
| Cd066   | UM4                 | N | +  | +  | +  | +  | UM-003 | 3180  | 0.223  | 36.82 | 0.1745 |
| Cd067   | UM4                 | N | +  | +  | +  | +  | UM-003 | 1255  | 0.106  | 38.50 | 0.0807 |
| Cd019   | UM5                 | N | +  | +  | -  | -  | UM-003 | 1820  | 0.042  | 27.71 | 0.2764 |
| Cd035   | UM5                 | N | +  | +  | -  | -  | UM-003 | 11400 | 0.045  | 68.86 | 0.0966 |
| Cd028   | UM6                 | N | +  | +  | -  | -  | UM-001 | 4833  | 0.534  | 60.25 | 0.0850 |
| DA00583 | UM6                 | N | +  | +  | -  | -  | sc15   | 20867 | 4.096  | 63.76 | 0.0802 |
| DA00297 | UM8                 | Y | +  | +  | -  | -  | ND     | 21233 | 0.298  | 17.50 | 0.0979 |
| Cd003   | UM8                 | N | +  | +  | -  | -  | UM-001 | 2437  | 0.124  | 38.07 | 0.0724 |
| DA00322 | UM9                 | N | +  | +  | -  | -  | sc3    | 6200  | 1.060  | 65.76 | 0.1007 |
| DA00692 | UM9                 | N | +  | +  | -  | -  | sc3    | 5800  | 3.726  | 57.81 | 0.0834 |
| Cd160   | Unique <sup>h</sup> | Y | +  | +  | -  | -  | ND     | 11650 | 0.028  | 62.21 | 0.1083 |
| DA00142 | Unique              | Y | ND | ND | ND | ND | UM-001 | 33500 | 1.218  | 52.86 | 0.0770 |
| DA00315 | Unique              | Y | ND | ND | ND | ND | ND     | 120   | 0.243  | ND    | 0.0782 |
| DA00483 | Unique              | Y | ND | ND | ND | ND | ND     | 33200 | 3.105  | 72.79 | 0.0768 |
| DA00484 | Unique              | Y | ND | ND | ND | ND | ND     | 847   | 0.036  | ND    | 0.1075 |
| Cd008   | Unique              | N | +  | +  | -  | -  | UM-004 | 8500  | 0.432  | 83.28 | 0.2107 |
| Cd018   | Unique              | N | +  | +  | +  | +  | UM-001 | 17750 | 0.192  | 86.96 | 0.3024 |
| Cd021   | Unique              | N | +  | +  | -  | -  | sc9    | 2500  | 0.154  | 53.70 | 0.1721 |

|         |        |         |    |    |    |    |        |       |        |       |        |
|---------|--------|---------|----|----|----|----|--------|-------|--------|-------|--------|
| Cd022   | Unique | N       | +  | +  | -  | -  | UM-006 | 27000 | 0.168  | 63.75 | 0.1125 |
| Cd045   | Unique | N       | +  | +  | -  | -  | UM-001 | 26600 | 0.151  | 64.44 | 0.3830 |
| Cd051   | unique | N       | +  | +  | -  | -  | UM-001 | 3833  | 0.228  | 59.60 | 0.0921 |
| Cd069   | Unique | N       | +  | +  | +  | +  | sc3    | 13950 | 0.084  | 44.83 | 0.1479 |
| Cd107   | Unique | N       | +  | +  | -  | -  | UM-001 | 120   | 0.169  | 86.52 | 0.1589 |
| DA00266 | Unique | N       | ND | ND | ND | ND | sc8    | 7667  | 53.223 | 38.05 | 0.0914 |
| DA00332 | Unique | N       | ND | ND | ND | ND | sc9    | 5000  | 5.179  | 51.42 | 0.0981 |
| VPI     | lab    | unknown | ND | ND | ND | ND | ND     | ND    | 7.140  | ND    | 0.0891 |

*a* – presence or absence of *tcdA*, *tcdB*, *cdtA*, and *cdtB* were determined using multiple PCR assay.

*b* – *tcdC* typing based on gene sequence

*c* – average sporulation totals for each isolate

*d* – average toxin production (ng/ml) totals for each isolate

*e* – average spore viability (CFE) for each isolate

*f* – average growth rates ( $\mu$ ) for each isolate

*g* – not determined

*h* – isolate is of a ribotype only included once in this study
